# Supplementary material for: Substrate self-derived porous rod-like NiS/Ni9S8/NF heterostructures as efficient bifunctional electrocatalysts for overall water splitting
Source: Royal Society of Chemistry journal article supplement (doi:10.1039/d3dt03056c), 2023-01-01
Supplement: d3dt03056c2.pdf [file d3dt03056c2.pdf]

**Table S1.** Comparison of HER and OER activities of NiS/Ni<sub>9</sub>S<sub>8</sub>/NF-2 with other reported TMSs electrocatalysts

| Catalyst                                               | J<br>(mA cm <sup>-2</sup> ) | Overpotential (mV) |     | Electrolyte | Reference        |
|--------------------------------------------------------|-----------------------------|--------------------|-----|-------------|------------------|
|                                                        |                             | HER                | OER |             |                  |
| NiS/Ni <sub>9</sub> S <sub>8</sub> /NF-2               | 10                          | 115                | 176 | 1 M KOH     | <b>This Work</b> |
| Co <sub>3</sub> S <sub>4</sub> @MoS <sub>2</sub>       | 10                          | 136                | 280 | 1 M KOH     | [1]              |
| Co <sub>3</sub> S <sub>4</sub> @FNC-Co3                | 10                          | 140                | 250 | 1 M KOH     | [2]              |
| T(Ni <sub>3</sub> S <sub>2</sub> /MnS-O)               | 10                          | 116                | 228 | 1 M KOH     | [3]              |
| FNHNs                                                  | 10                          | 140                | 290 | 1 M KOH     | [4]              |
| Fe <sub>0.8</sub> Ni <sub>0.15</sub> S <sub>1.05</sub> | 10                          | 263                | 228 | 1 M KOH     | [5]              |
| H-Fe-CoMoS                                             | 10                          | 137                | 282 | 1 M KOH     | [6]              |
| NiS                                                    | 10                          | -                  | 320 | 1 M KOH     | [7]              |
| Fe-Ni <sub>3</sub> S <sub>2</sub> /FeNi                | 10                          | -                  | 282 | 1 M KOH     | [8]              |
| FeNiS <sub>2</sub> NS/rGO                              | 10                          | -                  | 200 | 1 M KOH     | [9]              |
| CoNi-S/NS-rGO-550                                      | 10                          | -                  | 290 | 1 M KOH     | [10]             |
| NiCoFe-PS                                              | 10                          | -                  | 195 | 1 M KOH     | [11]             |
| Ni <sub>3</sub> S <sub>2</sub>                         | 10                          | -                  | 256 | 1 M KOH     | [12]             |
| N-CoS <sub>2</sub> @graphene                           | 10                          | -                  | 205 | 1 M KOH     | [13]             |
| Fe-MoS/carbon nanocomposites                           | 10                          | 321                | -   | 1 M KOH     | [14]             |
| a-CoSx                                                 | 10                          | 182                | -   | 1 M KOH     | [15]             |
| CoS@NiCoLDH                                            | 10                          | 124                | -   | 1 M KOH     | [16]             |

**Table S2.** Comparison of overall water splitting activities of NiS/Ni<sub>9</sub>S<sub>8</sub>/NF-2 with other reported TMSs electrocatalysts

| Catalysts (Cathode)                                    | Catalysts (anode)                                      | J (mA cm <sup>-2</sup> ) | Potential (V) | Reference        |
|--------------------------------------------------------|--------------------------------------------------------|--------------------------|---------------|------------------|
| NiS/Ni <sub>9</sub> S <sub>8</sub> /NF-2               | NiS/Ni <sub>9</sub> S <sub>8</sub> /NF-2               | 10                       | 1.53          | <b>This Work</b> |
| Co <sub>3</sub> S <sub>4</sub> @MoS <sub>2</sub>       | Co <sub>3</sub> S <sub>4</sub> @MoS <sub>2</sub>       | 10                       | 1.58          | [1]              |
| Co <sub>3</sub> S <sub>4</sub> @FNC-Co <sub>3</sub>    | Co <sub>3</sub> S <sub>4</sub> @FNC-Co <sub>3</sub>    | 10                       | 1.58          | [2]              |
| T(Ni <sub>3</sub> S <sub>2</sub> /MnS-O)               | T(Ni <sub>3</sub> S <sub>2</sub> /MnS-O)               | 10                       | 1.54          | [3]              |
| FNHNs                                                  | FNHNs                                                  | 10                       | 1.55          | [4]              |
| Fe <sub>0.8</sub> Ni <sub>0.15</sub> S <sub>1.05</sub> | Fe <sub>0.8</sub> Ni <sub>0.15</sub> S <sub>1.05</sub> | 10                       | 1.63          | [5]              |
| V-NiS <sub>2</sub>                                     | V-NiS <sub>2</sub>                                     | 10                       | 1.56          | [17]             |
| S, N-CNTs/ CoS <sub>2</sub> @Co                        | S, NCNTs/CoS <sub>2</sub> @Co                          | 10                       | 1.63          | [18]             |
| Ni <sub>3</sub> S <sub>2</sub> -FeS                    | Ni <sub>3</sub> S <sub>2</sub> -FeS                    | 10                       | 1.61          | [19]             |
| CoNi <sub>2</sub> S <sub>4</sub>                       | CoNi <sub>2</sub> S <sub>4</sub>                       | 10                       | 1.58          | [20]             |
| SW-CoS@CNT                                             | SW-CoS@CNT                                             | 10                       | 1.56          | [21]             |

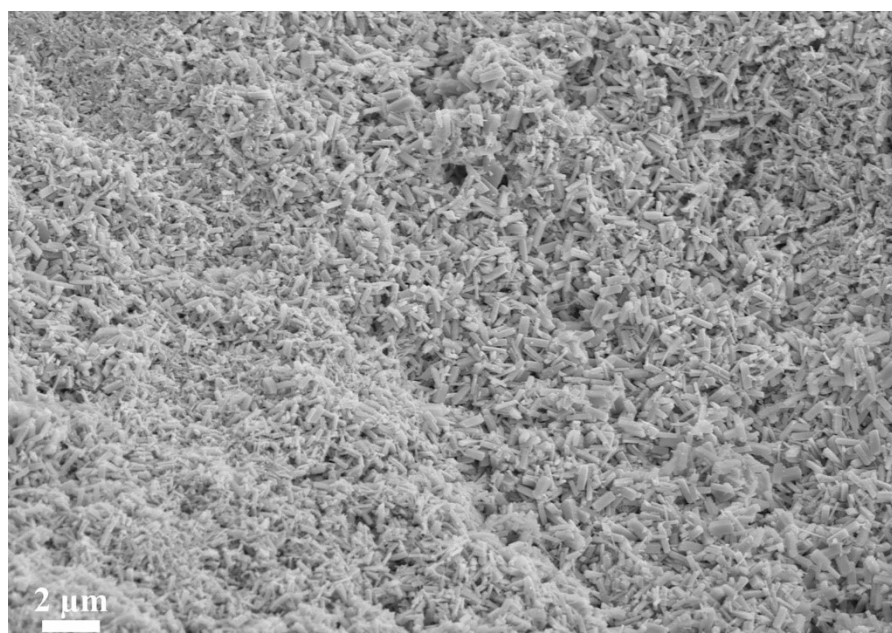

**Figure S1.** SEM image of NiC<sub>2</sub>O<sub>4</sub>·2H<sub>2</sub>O/NF-2 precursor.

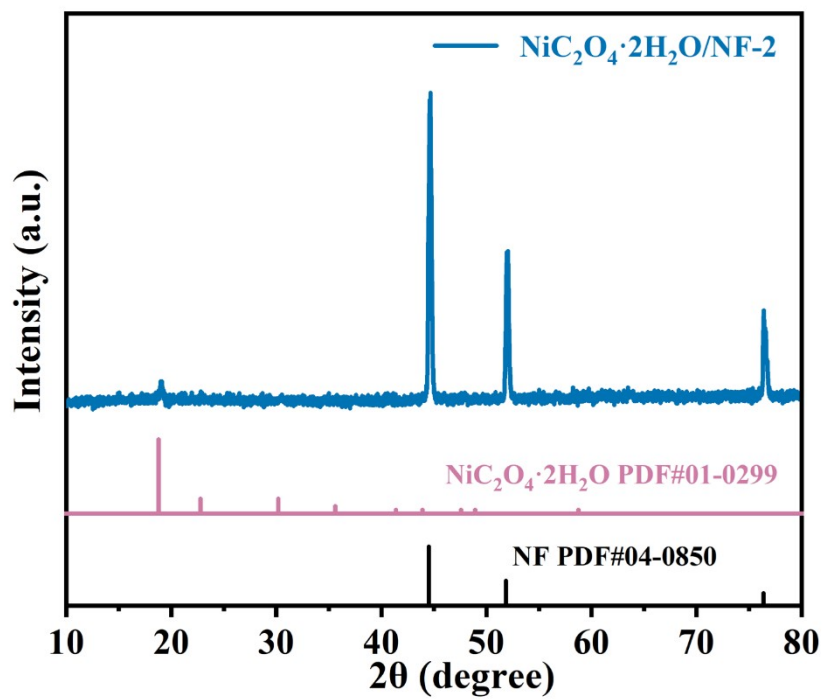

**Figure S2.** XRD pattern of  $\text{NiC}_2\text{O}_4 \cdot 2\text{H}_2\text{O}/\text{NF}-2$  precursor.

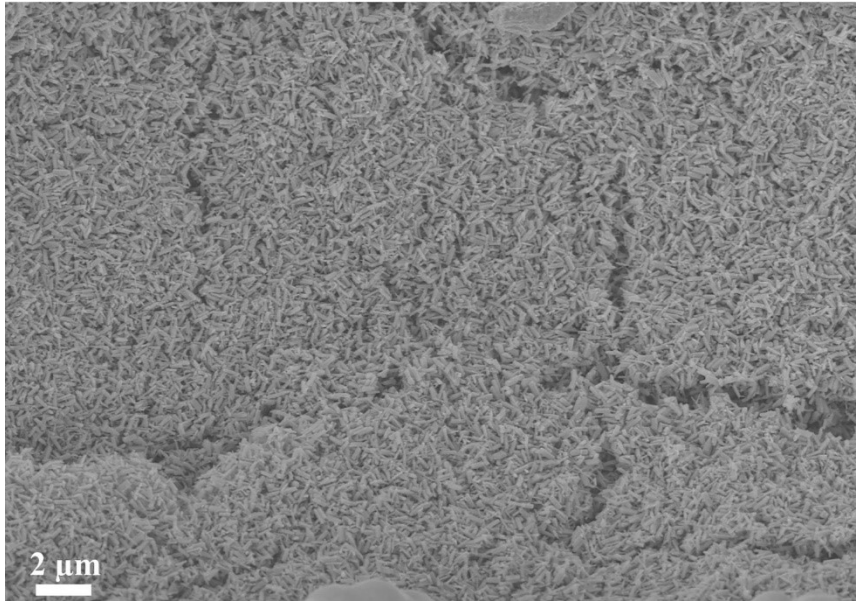

**Figure S3.** SEM image of NiS/Ni<sub>9</sub>S<sub>8</sub>/NF-2.

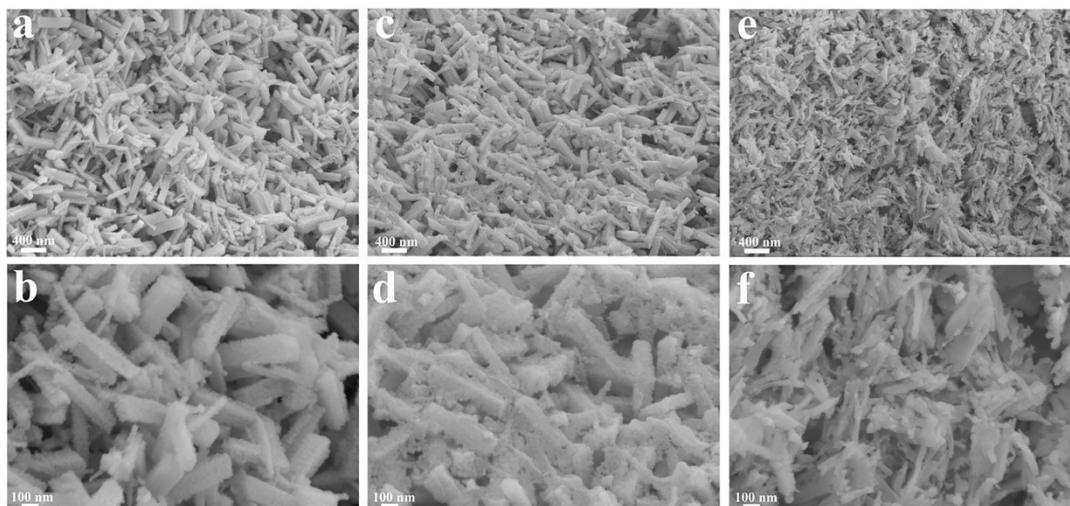

**Figure S4.** SEM images of (a, b) NiS/Ni<sub>9</sub>S<sub>8</sub>/NF-1, (c, d) NiS/Ni<sub>9</sub>S<sub>8</sub>/NF-3 and (e, f) NiS/Ni<sub>9</sub>S<sub>8</sub>/NF-4.

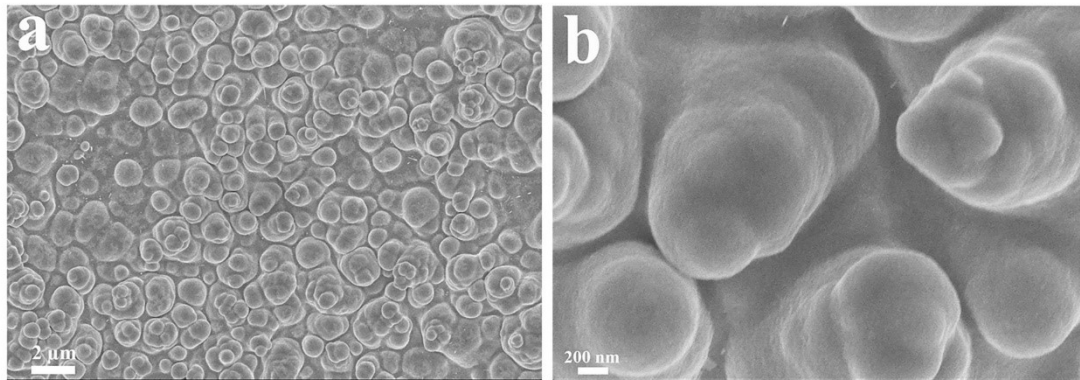

**Figure S5.** SEM images (a, b) of NiS/NiS<sub>2</sub>/Ni<sub>3</sub>S<sub>2</sub>/NF.

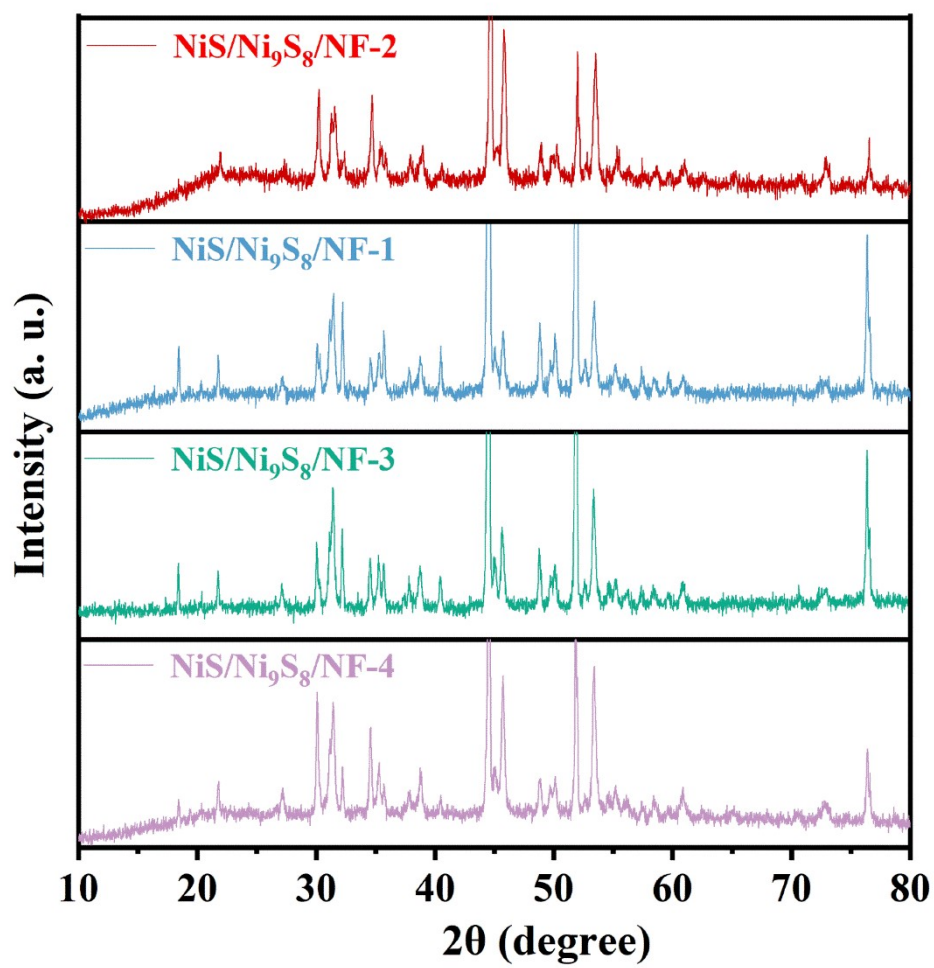

Figure S6. XRD patterns of NiS/Ni<sub>9</sub>S<sub>8</sub>/NF-1, NiS/Ni<sub>9</sub>S<sub>8</sub>/NF-3 and NiS/Ni<sub>9</sub>S<sub>8</sub>/NF-4.

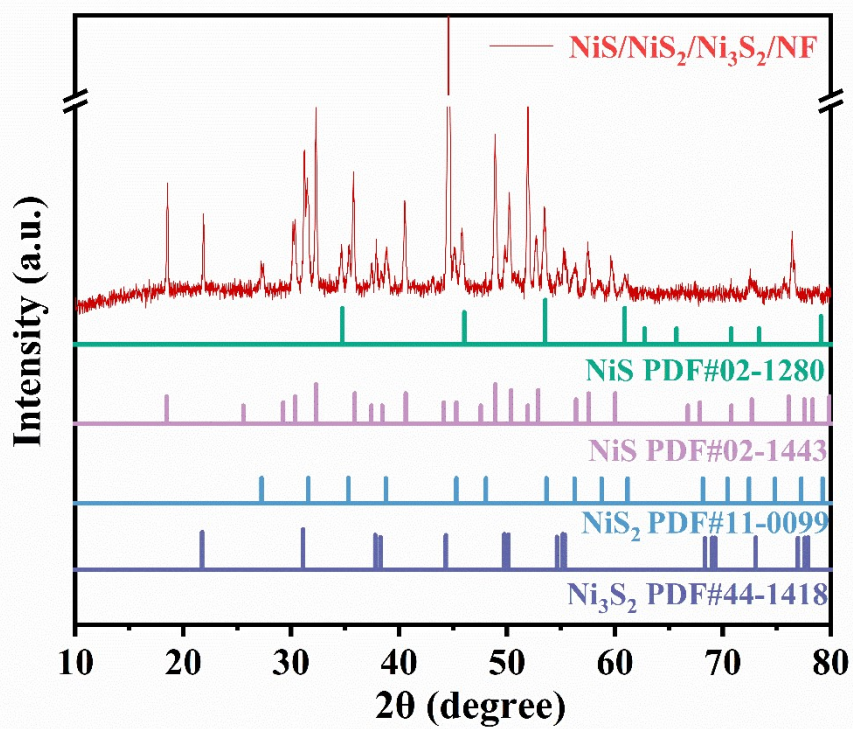

Figure S7. XRD pattern of NiS/NiS<sub>2</sub>/Ni<sub>3</sub>S<sub>2</sub>/NF.



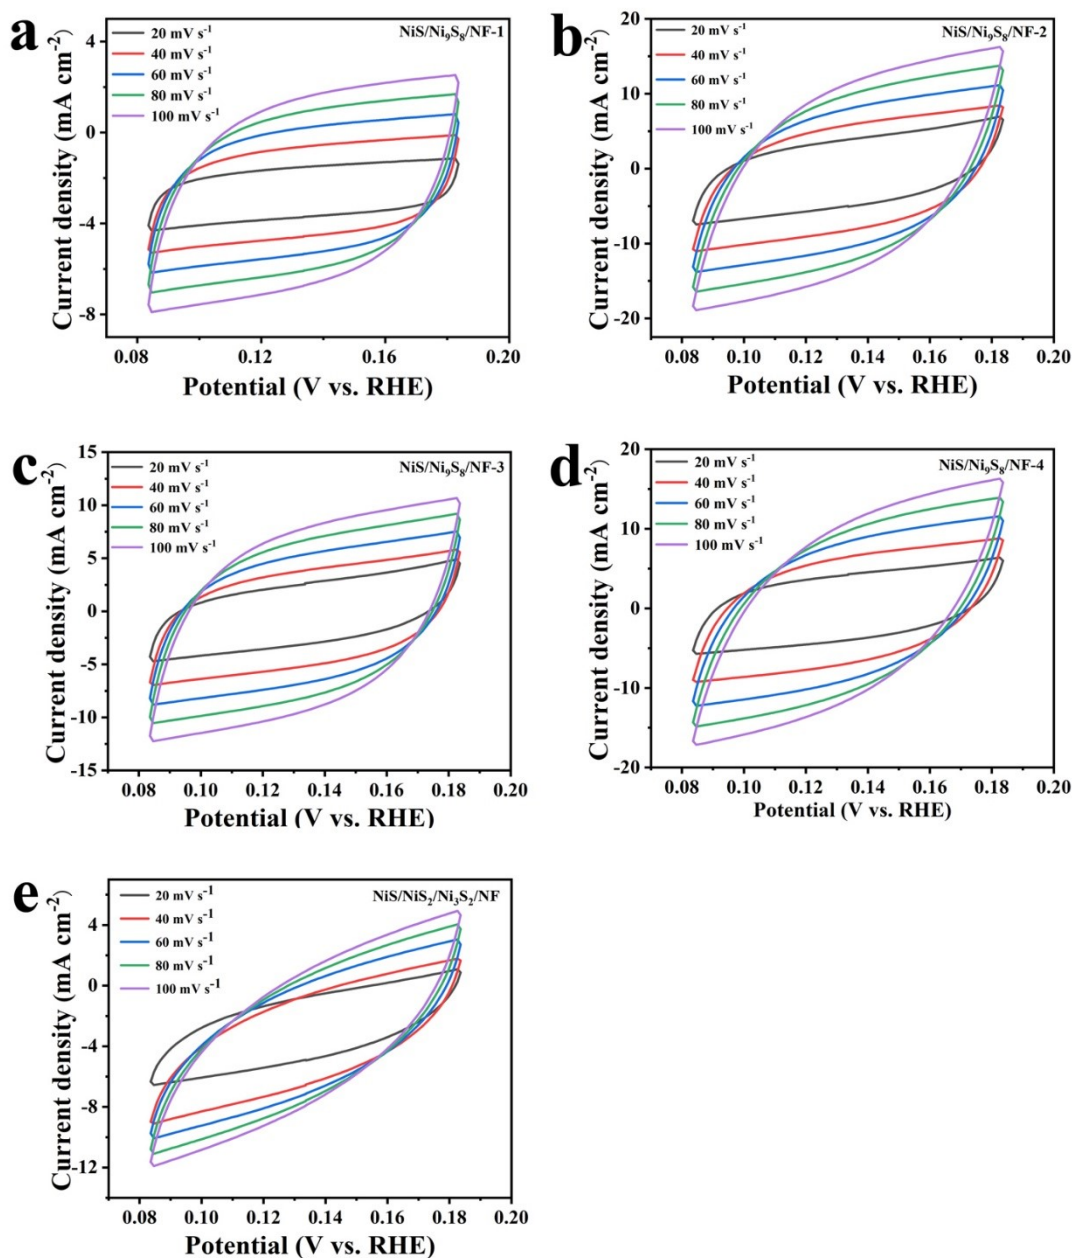

**Figure S8.** Cyclic voltammograms of (a) NiS/Ni<sub>9</sub>S<sub>8</sub>/NF-1, (b) NiS/Ni<sub>9</sub>S<sub>8</sub>/NF-2, (c) NiS/Ni<sub>9</sub>S<sub>8</sub>/NF-3, (d) NiS/Ni<sub>9</sub>S<sub>8</sub>/NF-4 and (e) NiS/NiS<sub>2</sub>/Ni<sub>3</sub>S<sub>2</sub>/NF in -0.9 ~ -0.8 V vs. RHE at different scan rates from 20 mV s<sup>-1</sup> to 100 mV s<sup>-1</sup> in 1.0 M KOH.

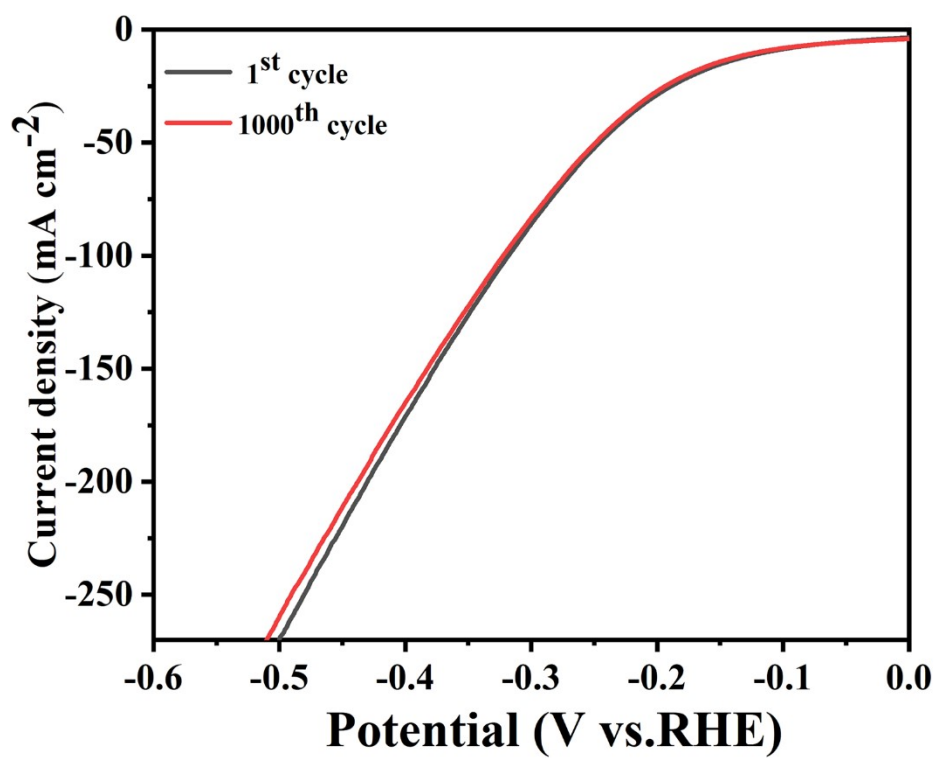

**Figure S9.** Polarization curves of NiS/Ni<sub>9</sub>S<sub>8</sub>/NF-2 before and after 1000 CV cycles.

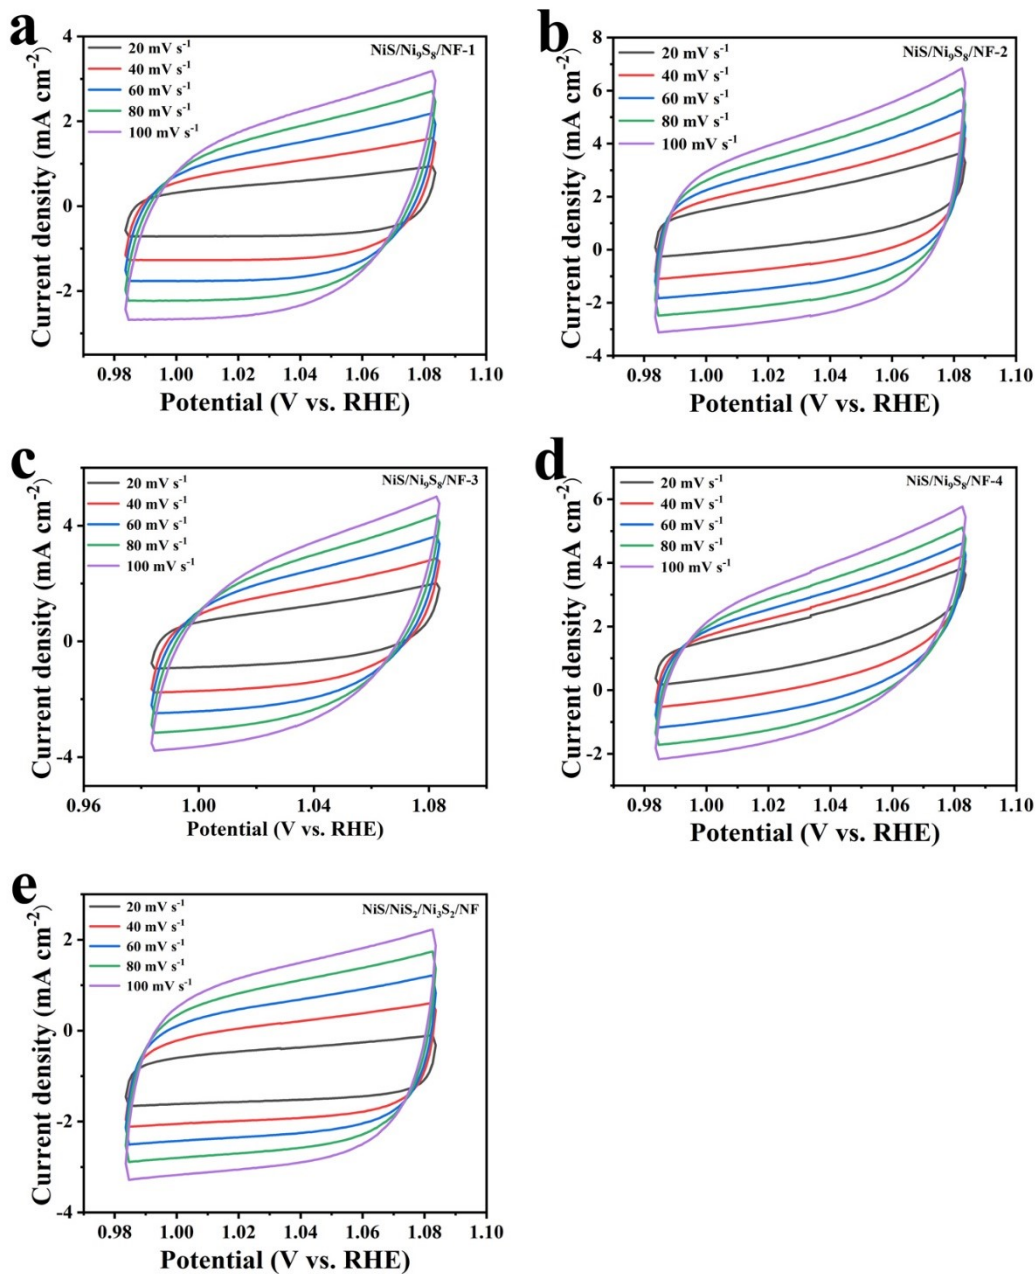

**Figure S10.** Cyclic voltammograms of (a) NiS/Ni<sub>9</sub>S<sub>8</sub>/NF-1, (b) NiS/Ni<sub>9</sub>S<sub>8</sub>/NF-2, (c) NiS/Ni<sub>9</sub>S<sub>8</sub>/NF-3, (d) NiS/Ni<sub>9</sub>S<sub>8</sub>/NF-4 and (e) NiS/NiS<sub>2</sub>/Ni<sub>3</sub>S<sub>2</sub>/NF in -0.9 ~ -0.8 V vs.

RHE at different scan rates from 20 mV s<sup>-1</sup> to 100 mV s<sup>-1</sup> in 1.0 M KOH.

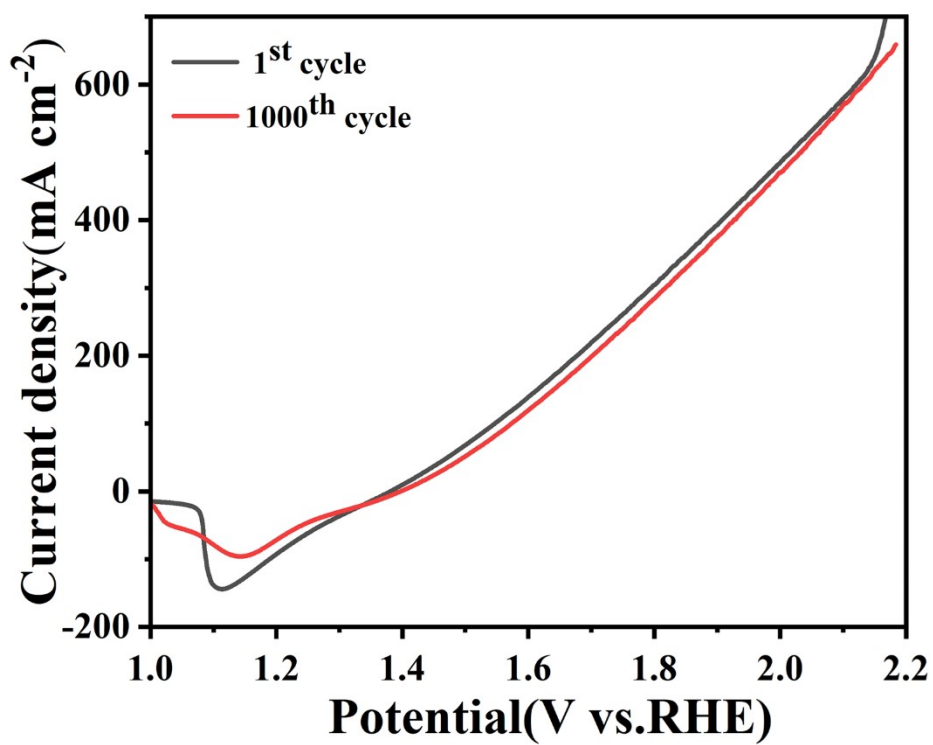

**Figure S11.** Polarization curves of NiS/Ni<sub>9</sub>S<sub>8</sub>/NF-2 before and after 1000 CV cycles.

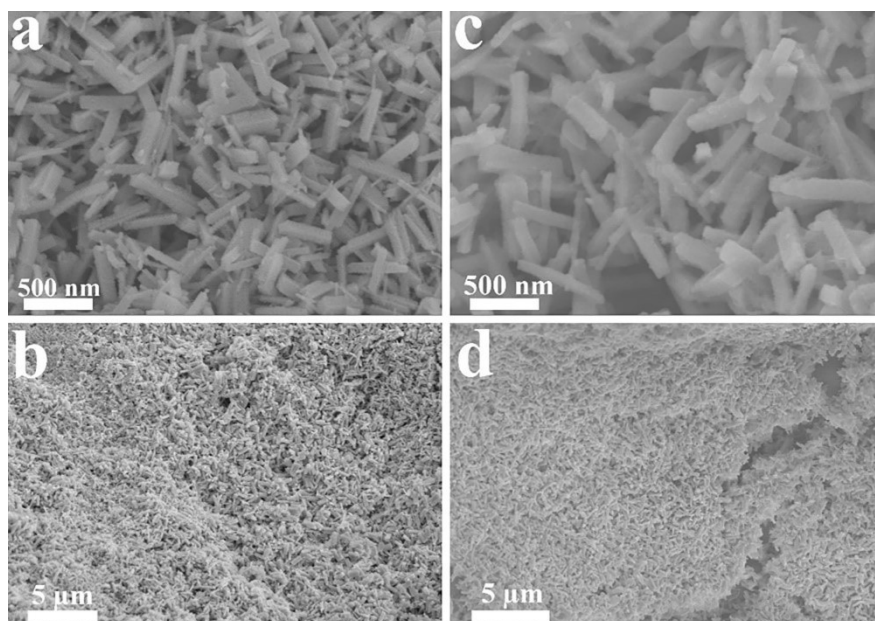

**Figure S12.** The SEM images of NiS/Ni<sub>9</sub>S<sub>8</sub>/NF-2 sample after (a,b) HER and (c,d) OER.

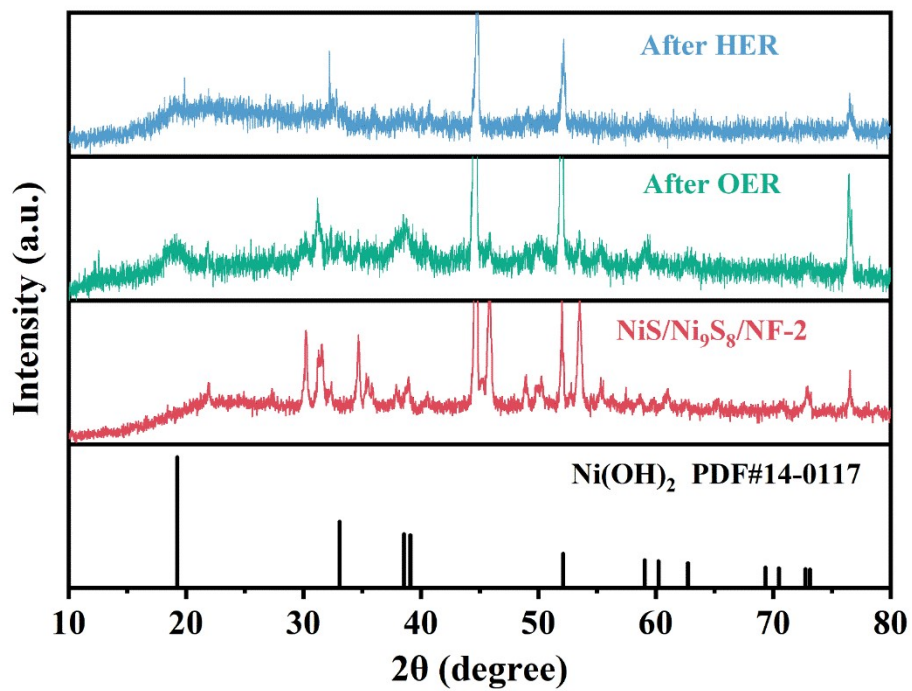

**Figure S13.** XRD patterns of NiS/Ni<sub>9</sub>S<sub>8</sub>/NF-2 after 100 h long term electrolysis for the HER and 80 h long term electrolysis for the OER.

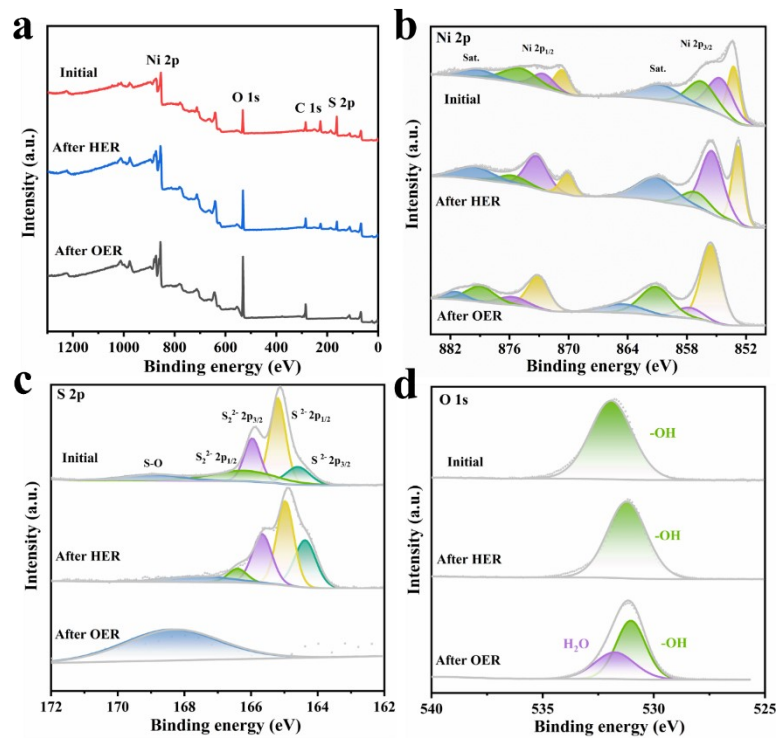

**Figure S14.** (a) XPS survey, (b) Ni 2p, (c) S 2p, (d) O 1s spectra of NiS/Ni<sub>9</sub>S<sub>8</sub>/NF-2 after i-t performance test of water splitting.
